# Supplementary material
Source: Research Square preprint supplement (doi:10.21203/rs.3.rs-9120312/v1)
Supplement: Supplementary file 1 [file 125a6284e6100a0e156e49e3.docx]

**SUPPLEMENTARY TABLES (3-5)**

| Table 3: Types and Frequency of sourcing of Information during COVID 19 Crisis | | | | |
| --- | --- | --- | --- | --- |
| Types of Information | Frequently (%) | Most times (%) | Not at all (%) | Often (%) |
| COVID-related Information | 90 (21.4) | 85 (20.2) | 145 (34.5) | 100 (23.81) |
| Other Medical information | 84 (20.0) | 89 (21.2) | 116 (27.6) | 131 (31.2) |
| Social News | 104 (24.8) | 136 (32.4) | 87 (20.7) | 93(22.1) |
| Blog Messages | 89 (21.2) | 74 (17.62) | 183 (43.6) | 74 (17.6) |

| Table 4: Respondents Perception of the Types of Information Received During COVID-19 | |
| --- | --- |
| Types of Information | **Frequency (%)** |
| Conspiracy Theories | 114 (27.1) |
| Fake News | 33 (7.8) |
| False News | 109 (25.9) |
| Propaganda | 69 (16.4) |
| Rumours | 95 (22.6) |

| Table 5: Respondents’ Perception of the Impact of Information Received on Well-being | | |
| --- | --- | --- |
| Impact of Information | **n** | **Frequency (%)** |
| Any Impact of the Information on Individuals | No | 174 (41.4%) |
|  | Yes | 246 (58.5%) |
| Affected my mental health | 43 | (17.4) |
| Caused a lot confusion, didn’t know who to believe | 67 | (27.2%) |
| It affected my thinking | 62 | (25.2%) |
| It discouraged me from taking the vaccine | 20 | (8.1%) |
| Lost confidence in our health authority | 25 | (10.1%) |
| Lost trust in health authority | 29 | (11.7%) |
| Total | 246 | (100%) |
